# Supplementary material for: Inference of principal species in caustic aluminate solutions through solid-state spectroscopic characterization
Source: Royal Society of Chemistry journal article supplement (doi:10.1039/d0dt00229a), 2020-01-01
Supplement: d0dt00229a1.pdf [file d0dt00229a1.pdf]

# Inference of Principal Species in Caustic Aluminate Solutions Through Solid-State Spectroscopic Characterization

Mateusz Dembowski<sup>†</sup>, Micah P. Prange<sup>†</sup>, Maxime Pouvreau<sup>‡</sup>, Trent R. Graham<sup>†</sup>, Mark E. Bowden<sup>†</sup>, Alpha N'Diaye<sup>‡</sup>, Gregory K. Schenter<sup>†</sup>, Sue B. Clark<sup>†</sup>, Aurora E. Clark<sup>‡</sup>, Kevin M. Rosso<sup>†</sup> and Carolyn I. Pearce<sup>†</sup>

<sup>†</sup>Pacific Northwest National Laboratory, Richland, Washington, 99352, United States

<sup>‡</sup>Department of Chemistry, Washington State University, Pullman, Washington, 99164, United States

<sup>‡</sup>Advanced Light Source, Lawrence Berkeley National Laboratory, Berkeley, California, 94720, United States

## Table of Contents

|                                                                                                                                      |            |
|--------------------------------------------------------------------------------------------------------------------------------------|------------|
| <sup>27</sup> Al MAS-NMR                                                                                                             | pp. S2     |
| Comparison of K <sub>2</sub> Al <sub>2</sub> O(OH) <sub>6</sub> and Rb <sub>2</sub> Al <sub>2</sub> O(OH) <sub>6</sub> conformations | pp. S3     |
| AIMD Al K-edge EXAFS of CsAl(OH) <sub>4</sub> ·2H <sub>2</sub> O and Rb <sub>2</sub> Al <sub>2</sub> O(OH) <sub>6</sub>              | pp. S3-4   |
| Crystallographic Tables                                                                                                              |            |
| K <sub>2</sub> Al <sub>2</sub> O(OH) <sub>6</sub>                                                                                    | pp. S5-8   |
| Rb <sub>2</sub> Al <sub>2</sub> O(OH) <sub>6</sub>                                                                                   | pp. S9-12  |
| CsAl(OH) <sub>4</sub> ·2H <sub>2</sub> O                                                                                             | pp. S13-16 |

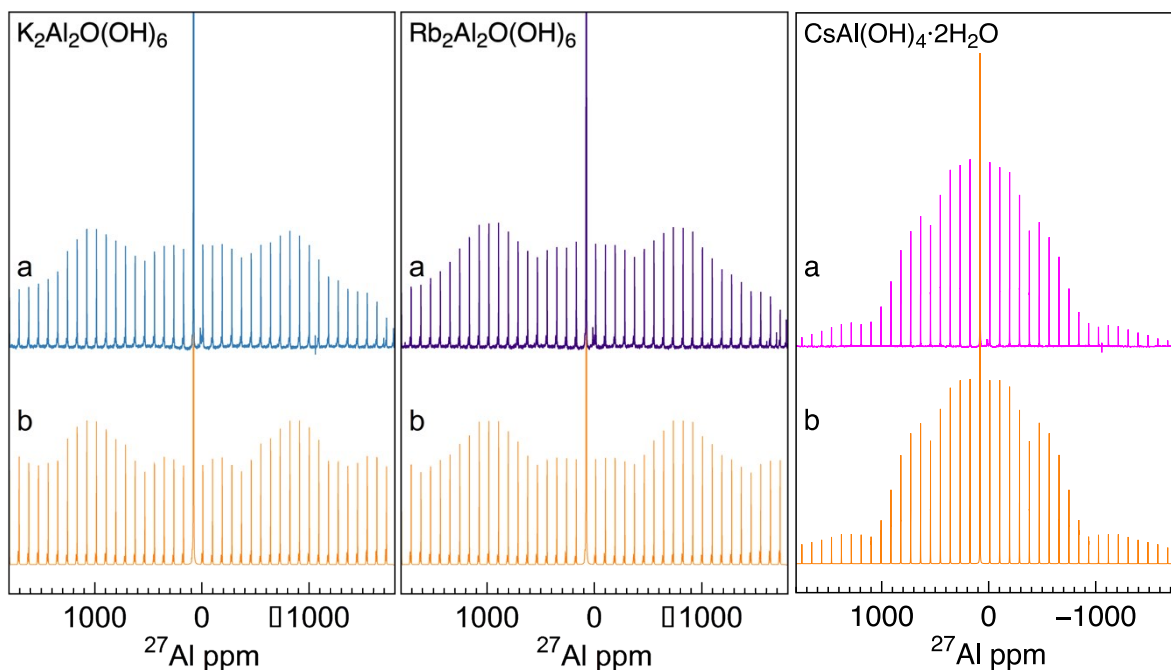

**Figure S1.** Experimental (top) and model fits (bottom)  $^{27}\text{Al}$  MAS-NMR of  $\text{K}_2\text{Al}_2\text{O}(\text{OH})_6$  (left),  $\text{Rb}_2\text{Al}_2\text{O}(\text{OH})_6$  (center), and  $\text{CsAl}(\text{OH})_4 \cdot 2\text{H}_2\text{O}$  collected at 19.975 T and 20 kHz spin rate.

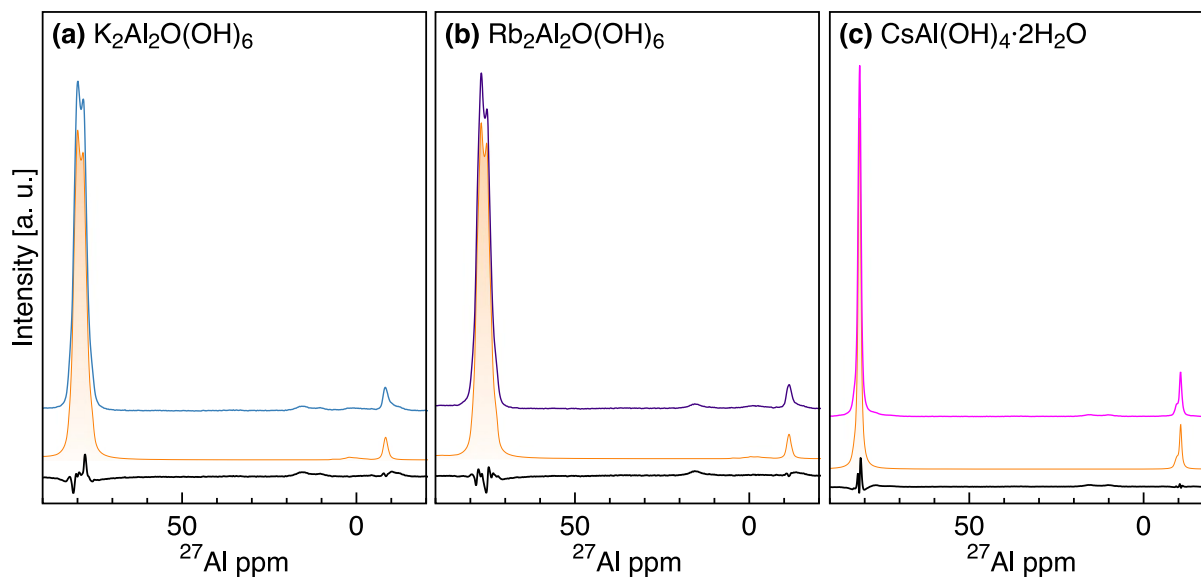

**Figure S2.** Difference (black), experimental (blue, purple, magenta) and model fits (orange)  $^{27}\text{Al}$  MAS-NMR of  $\text{K}_2\text{Al}_2\text{O}(\text{OH})_6$  (left),  $\text{Rb}_2\text{Al}_2\text{O}(\text{OH})_6$  (center), and  $\text{CsAl}(\text{OH})_4 \cdot 2\text{H}_2\text{O}$  collected at 19.975 T and 20 kHz spin rate. Signals at ca. -10 ppm are the spinning side bands. Those at ca. 10-15 ppm correspond to trace octahedral impurities.

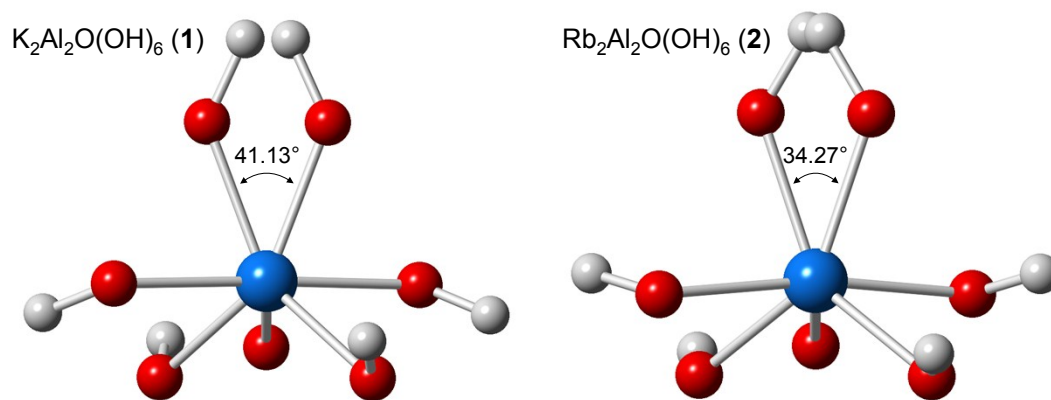

**Figure S3.** Comparison of conformations of the K (left) and Rb (right) salt of the  $\text{Al}_2\text{O}(\text{OH})_6^{2-}$ . Blue, red, and white spheres represent aluminum, oxygen, and hydrogen atoms, respectively.

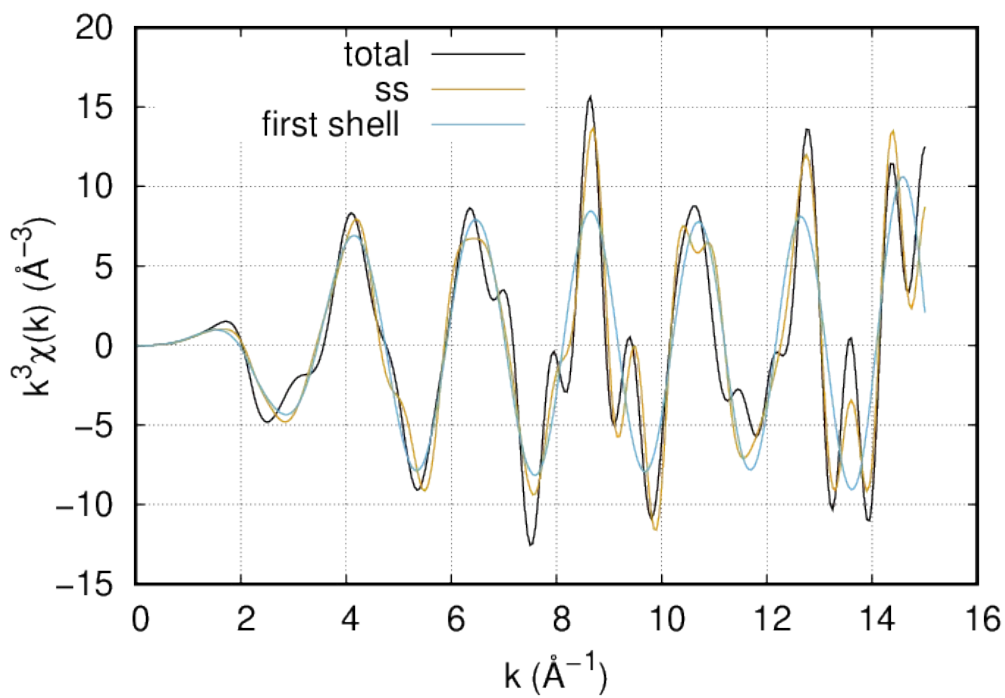

**Figure S4.** AIMD predicted EXAFS in k-space for the full set of paths (black), single-scattering paths (orange), and first-shell single-scattering paths (blue) for a single structure.

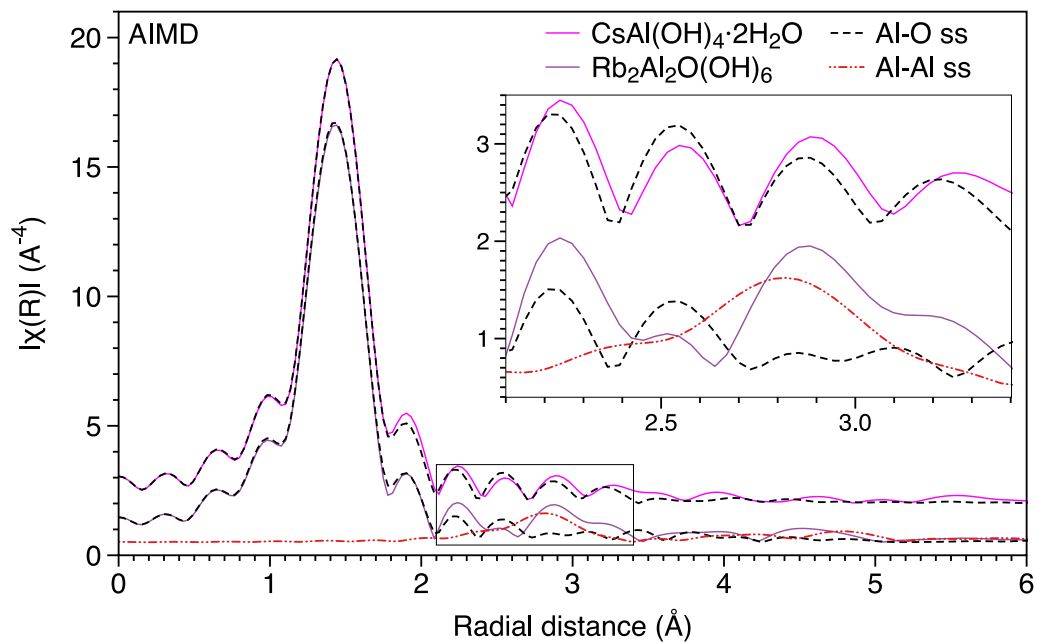

**Figure S5.** R-space EXAFS showing magnitude for **2** and **3**. Forward Fourier transform k-range between 3 and 13  $\text{\AA}^{-1}$  used.

## Crystallographic Tables

### Crystal data for $K_2Al_2O(OH)_6$ (1)

---

|                                 |                                                         |
|---------------------------------|---------------------------------------------------------|
| $K_2Al_2O_7H_6$                 | $D_x = 2.169 \text{ Mg m}^{-3}$                         |
| $M_r = 250.21$                  | Ag $K\alpha$ radiation, $\lambda = 0.56086 \text{ \AA}$ |
| Orthorhombic, $Aba2$            | Cell parameters from 2593 reflections                   |
| $a = 10.1605 (12) \text{ \AA}$  | $q = 3.1\text{--}26.8^\circ$                            |
| $b = 7.5416 (8) \text{ \AA}$    | $m = 0.75 \text{ mm}^{-1}$                              |
| $c = 9.9990 (12) \text{ \AA}$   | $T = 110 \text{ K}$                                     |
| $V = 766.19 (15) \text{ \AA}^3$ | Blocky, colorless                                       |
| $Z = 4$                         | $0.04 \times 0.03 \times 0.02 \text{ mm}$               |
| $F(000) = 504$                  |                                                         |

---

*Data collection*

---

|                                                        |                                                              |
|--------------------------------------------------------|--------------------------------------------------------------|
| Bruker APEX-II CCD diffractometer                      | 1478 reflections with $I > 2s(I)$                            |
| f and $\omega$ scans                                   | $R_{\text{int}} = 0.085$                                     |
| Absorption correction: multi-scan SADABS (Krause 2015) | $q_{\text{max}} = 26.9^\circ$ , $q_{\text{min}} = 3.1^\circ$ |
| $T_{\text{min}} = 0.663$ , $T_{\text{max}} = 0.746$    | $h = -16^{\circ}16$                                          |
| 9194 measured reflections                              | $k = -12^{\circ}12$                                          |
| 1687 independent reflections                           | $l = -16^{\circ}16$                                          |

---

*Refinement*

---

|                            |                                                                   |
|----------------------------|-------------------------------------------------------------------|
| Refinement on $F^2$        | Hydrogen site location: difference Fourier map                    |
| Least-squares matrix: full | All H-atom parameters refined                                     |
| $R[F^2 > 2s(F^2)] = 0.037$ | $w = 1/[s^2(F_o^2) + (0.0241P)^2]$ where $P = (F_o^2 + 2F_c^2)/3$ |
| $wR(F^2) = 0.068$          | $(D/s)_{\text{max}} < 0.001$                                      |
| $S = 1.12$                 | $D\rho_{\text{max}} = 0.46 \text{ e \AA}^{-3}$                    |
| 1687 reflections           | $D\rho_{\text{min}} = -0.53 \text{ e \AA}^{-3}$                   |

---

|               |                                                                                                                                               |
|---------------|-----------------------------------------------------------------------------------------------------------------------------------------------|
| 63 parameters | Absolute structure: Flack x determined using 623 quotients [(+)-(I-)]/[(+)+(I-)] (Parsons, Flack and Wagner, Acta Cryst. B69 (2013) 249-259). |
| 4 restraints  | Absolute structure parameter: 0.00 (6)                                                                                                        |

### Special details

*Geometry.* All esds (except the esd in the dihedral angle between two l.s. planes) are estimated using the full covariance matrix. The cell esds are taken into account individually in the estimation of esds in distances, angles and torsion angles; correlations between esds in cell parameters are only used when they are defined by crystal symmetry. An approximate (isotropic) treatment of cell esds is used for estimating esds involving l.s. planes.

### Fractional atomic coordinates and isotropic or equivalent isotropic displacement parameters ( $\text{\AA}^2$ ) for (K2Al2O8H6)

|     | x           | y            | z           | $U_{\text{iso}}^*/U_{\text{eq}}$ |
|-----|-------------|--------------|-------------|----------------------------------|
| K1  | 0.30153 (6) | 0.02766 (8)  | 0.59783 (6) | 0.00989 (12)                     |
| Al1 | 0.49154 (8) | 0.20877 (10) | 0.86079 (9) | 0.00461 (16)                     |
| O1  | 0.6432 (2)  | 0.3220 (2)   | 0.8575 (3)  | 0.0091 (4)                       |
| H1  | 0.718 (3)   | 0.259 (6)    | 0.827 (6)   | 0.058 (19)*                      |
| O2  | 0.3787 (2)  | 0.3316 (3)   | 0.7611 (2)  | 0.0078 (4)                       |
| H2  | 0.380 (6)   | 0.446 (3)    | 0.799 (5)   | 0.054 (18)*                      |
| O3  | 0.4299 (2)  | 0.2183 (3)   | 1.0253 (2)  | 0.0103 (4)                       |
| H3  | 0.469 (7)   | 0.202 (8)    | 1.111 (4)   | 0.10 (3)*                        |
| O4  | 0.500000    | 0.000000     | 0.7927 (3)  | 0.0072 (5)                       |

### Atomic displacement parameters ( $\text{\AA}^2$ ) for (K2Al2O8H6)

|     | $U^{11}$   | $U^{22}$   | $U^{33}$    | $U^{12}$    | $U^{13}$     | $U^{23}$     |
|-----|------------|------------|-------------|-------------|--------------|--------------|
| K1  | 0.0100 (2) | 0.0108 (2) | 0.0089 (2)  | 0.0012 (2)  | 0.0005 (3)   | 0.0011 (3)   |
| Al1 | 0.0050 (4) | 0.0042 (3) | 0.0047 (4)  | 0.0001 (3)  | -0.0006 (4)  | -0.0005 (4)  |
| O1  | 0.0046 (9) | 0.0080 (8) | 0.0149 (10) | -0.0007 (6) | -0.0013 (10) | -0.0023 (10) |

|    |             |             |             |             |             |             |
|----|-------------|-------------|-------------|-------------|-------------|-------------|
| O2 | 0.0069 (10) | 0.0071 (9)  | 0.0094 (10) | 0.0008 (7)  | -0.0027 (8) | 0.0005 (7)  |
| O3 | 0.0115 (11) | 0.0132 (10) | 0.0062 (9)  | 0.0018 (8)  | 0.0008 (8)  | -0.0011 (8) |
| O4 | 0.0109 (14) | 0.0028 (12) | 0.0078 (12) | 0.0003 (10) | 0.000       | 0.000       |

*Geometric parameters (Å, °) for (K2Al2O8H6)*

|                                        |            |                                         |             |
|----------------------------------------|------------|-----------------------------------------|-------------|
| K1—O1 <sup>i</sup>                     | 2.716 (3)  | K1—Al1                                  | 3.5365 (11) |
| K1—O3 <sup>ii</sup>                    | 2.770 (2)  | K1—Al1 <sup>i</sup>                     | 3.7402 (11) |
| K1—O4                                  | 2.812 (2)  | K1—Al1 <sup>vi</sup>                    | 3.8097 (11) |
| K1—O3 <sup>iii</sup>                   | 2.850 (2)  | K1—Al1 <sup>ii</sup>                    | 3.8895 (11) |
| K1—O2 <sup>iv</sup>                    | 2.865 (2)  | Al1—O4                                  | 1.7177 (15) |
| K1—O2                                  | 2.921 (2)  | Al1—O1                                  | 1.761 (2)   |
| K1—O1 <sup>v</sup>                     | 3.259 (3)  | Al1—O3                                  | 1.762 (3)   |
| K1—O3 <sup>i</sup>                     | 3.412 (2)  | Al1—O2                                  | 1.779 (2)   |
| O1 <sup>i</sup> —K1—O3 <sup>ii</sup>   | 91.30 (7)  | O3 <sup>ii</sup> —K1—Al1 <sup>ii</sup>  | 23.91 (5)   |
| O1 <sup>i</sup> —K1—O4                 | 119.71 (7) | O4—K1—Al1 <sup>ii</sup>                 | 91.16 (4)   |
| O3 <sup>ii</sup> —K1—O4                | 77.35 (6)  | O3 <sup>iii</sup> —K1—Al1 <sup>ii</sup> | 124.50 (5)  |
| O1 <sup>i</sup> —K1—O3 <sup>iii</sup>  | 74.64 (7)  | O2 <sup>iv</sup> —K1—Al1 <sup>ii</sup>  | 110.21 (5)  |
| O3 <sup>ii</sup> —K1—O3 <sup>iii</sup> | 138.32 (8) | O2—K1—Al1 <sup>ii</sup>                 | 133.83 (5)  |
| O4—K1—O3 <sup>iii</sup>                | 143.66 (6) | O1 <sup>v</sup> —K1—Al1 <sup>ii</sup>   | 161.07 (4)  |
| O1 <sup>i</sup> —K1—O2 <sup>iv</sup>   | 148.45 (7) | O3 <sup>i</sup> —K1—Al1 <sup>ii</sup>   | 79.68 (4)   |
| O3 <sup>ii</sup> —K1—O2 <sup>iv</sup>  | 90.88 (7)  | Al1—K1—Al1 <sup>ii</sup>                | 114.89 (3)  |
| O4—K1—O2 <sup>iv</sup>                 | 91.44 (6)  | Al1 <sup>i</sup> —K1—Al1 <sup>ii</sup>  | 70.33 (3)   |
| O3 <sup>iii</sup> —K1—O2 <sup>iv</sup> | 82.99 (7)  | Al1 <sup>vi</sup> —K1—Al1 <sup>ii</sup> | 81.793 (14) |
| O1 <sup>i</sup> —K1—O2                 | 96.40 (7)  | O4—Al1—O1                               | 113.15 (9)  |
| O3 <sup>ii</sup> —K1—O2                | 132.91 (7) | O4—Al1—O3                               | 115.17 (12) |
| O4—K1—O2                               | 58.56 (5)  | O1—Al1—O3                               | 107.97 (13) |
| O3 <sup>iii</sup> —K1—O2               | 88.16 (6)  | O4—Al1—O2                               | 106.69 (11) |

---

|                                        |            |                                           |             |
|----------------------------------------|------------|-------------------------------------------|-------------|
| O2 <sup>iv</sup> —K1—O2                | 104.94 (8) | O1—Al1—O2                                 | 107.52 (11) |
| O1 <sup>i</sup> —K1—O1 <sup>v</sup>    | 131.44 (7) | O3—Al1—O2                                 | 105.83 (11) |
| O3 <sup>ii</sup> —K1—O1 <sup>v</sup>   | 137.25 (6) | O4—Al1—K1                                 | 51.57 (7)   |
| O4—K1—O1 <sup>v</sup>                  | 80.09 (6)  | O1—Al1—K1                                 | 130.60 (10) |
| O3 <sup>iii</sup> —K1—O1 <sup>v</sup>  | 67.65 (6)  | O3—Al1—K1                                 | 121.06 (8)  |
| O2 <sup>iv</sup> —K1—O1 <sup>v</sup>   | 53.83 (5)  | O2—Al1—K1                                 | 55.44 (7)   |
| O2—K1—O1 <sup>v</sup>                  | 54.13 (6)  | O4—Al1—K1 <sup>vii</sup>                  | 135.26 (6)  |
| O1 <sup>i</sup> —K1—O3 <sup>i</sup>    | 53.98 (6)  | O1—Al1—K1 <sup>vii</sup>                  | 42.49 (9)   |
| O3 <sup>ii</sup> —K1—O3 <sup>i</sup>   | 92.34 (7)  | O3—Al1—K1 <sup>vii</sup>                  | 65.57 (8)   |
| O4—K1—O3 <sup>i</sup>                  | 67.38 (5)  | O2—Al1—K1 <sup>vii</sup>                  | 116.14 (8)  |
| O3 <sup>iii</sup> —K1—O3 <sup>i</sup>  | 108.82 (4) | K1—Al1—K1 <sup>vii</sup>                  | 169.51 (3)  |
| O2 <sup>iv</sup> —K1—O3 <sup>i</sup>   | 157.24 (7) | O4—Al1—K1 <sup>vi</sup>                   | 43.08 (6)   |
| O2—K1—O3 <sup>i</sup>                  | 57.56 (6)  | O1—Al1—K1 <sup>vi</sup>                   | 74.41 (8)   |
| O1 <sup>v</sup> —K1—O3 <sup>i</sup>    | 111.64 (6) | O3—Al1—K1 <sup>vi</sup>                   | 149.28 (8)  |
| O1 <sup>i</sup> —K1—Al1                | 112.55 (5) | O2—Al1—K1 <sup>vi</sup>                   | 102.29 (8)  |
| O3 <sup>ii</sup> —K1—Al1               | 105.24 (6) | K1—Al1—K1 <sup>vi</sup>                   | 66.88 (3)   |
| O4—K1—Al1                              | 28.59 (2)  | K1 <sup>vii</sup> —Al1—K1 <sup>vi</sup>   | 112.08 (3)  |
| O3 <sup>iii</sup> —K1—Al1              | 116.41 (5) | O4—Al1—K1 <sup>viii</sup>                 | 146.44 (6)  |
| O2 <sup>iv</sup> —K1—Al1               | 97.15 (5)  | O1—Al1—K1 <sup>viii</sup>                 | 98.38 (8)   |
| O2—K1—Al1                              | 30.10 (5)  | O3—Al1—K1 <sup>viii</sup>                 | 39.60 (7)   |
| O1 <sup>v</sup> —K1—Al1                | 62.79 (4)  | O2—Al1—K1 <sup>viii</sup>                 | 72.51 (8)   |
| O3 <sup>i</sup> —K1—Al1                | 60.30 (4)  | K1—Al1—K1 <sup>viii</sup>                 | 114.89 (3)  |
| O1 <sup>i</sup> —K1—Al1 <sup>i</sup>   | 25.98 (5)  | K1 <sup>vii</sup> —Al1—K1 <sup>viii</sup> | 64.17 (2)   |
| O3 <sup>ii</sup> —K1—Al1 <sup>i</sup>  | 90.98 (5)  | K1 <sup>vi</sup> —Al1—K1 <sup>viii</sup>  | 169.71 (3)  |
| O4—K1—Al1 <sup>i</sup>                 | 94.32 (4)  | Al1—O1—K1 <sup>vii</sup>                  | 111.53 (12) |
| O3 <sup>iii</sup> —K1—Al1 <sup>i</sup> | 91.98 (5)  | Al1—O1—K1 <sup>ix</sup>                   | 127.98 (12) |
| O2 <sup>iv</sup> —K1—Al1 <sup>i</sup>  | 174.21 (5) | K1 <sup>vii</sup> —O1—K1 <sup>ix</sup>    | 117.22 (7)  |
| O2—K1—Al1 <sup>i</sup>                 | 77.67 (5)  | Al1—O2—K1 <sup>x</sup>                    | 179.30 (13) |
| O1 <sup>v</sup> —K1—Al1 <sup>i</sup>   | 126.70 (4) | Al1—O2—K1                                 | 94.46 (9)   |

---



|                                         |             |                                          |             |
|-----------------------------------------|-------------|------------------------------------------|-------------|
| O3 <sup>i</sup> —K1—Al1 <sup>i</sup>    | 28.04 (4)   | K1 <sup>x</sup> —O2—K1                   | 85.12 (6)   |
| Al1—K1—Al1 <sup>i</sup>                 | 87.650 (16) | Al1—O3—K1 <sup>viii</sup>                | 116.49 (11) |
| O1 <sup>i</sup> —K1—Al1 <sup>vi</sup>   | 133.78 (5)  | Al1—O3—K1 <sup>xi</sup>                  | 120.69 (11) |
| O3 <sup>ii</sup> —K1—Al1 <sup>vi</sup>  | 61.74 (5)   | K1 <sup>viii</sup> —O3—K1 <sup>xi</sup>  | 88.26 (6)   |
| O4—K1—Al1 <sup>vi</sup>                 | 24.664 (17) | Al1—O3—K1 <sup>vii</sup>                 | 86.39 (9)   |
| O3 <sup>iii</sup> —K1—Al1 <sup>vi</sup> | 150.12 (5)  | K1 <sup>viii</sup> —O3—K1 <sup>vii</sup> | 81.25 (6)   |
| O2 <sup>iv</sup> —K1—Al1 <sup>vi</sup>  | 73.60 (5)   | K1 <sup>xi</sup> —O3—K1 <sup>vii</sup>   | 152.75 (9)  |
| O2—K1—Al1 <sup>vi</sup>                 | 80.40 (5)   | Al1—O4—Al1 <sup>vi</sup>                 | 133.26 (19) |
| O1 <sup>v</sup> —K1—Al1 <sup>vi</sup>   | 83.42 (4)   | Al1—O4—K1 <sup>vi</sup>                  | 112.25 (6)  |
| O3 <sup>i</sup> —K1—Al1 <sup>vi</sup>   | 88.17 (4)   | Al1 <sup>vi</sup> —O4—K1 <sup>vi</sup>   | 99.84 (6)   |
| Al1—K1—Al1 <sup>vi</sup>                | 50.68 (3)   | Al1—O4—K1                                | 99.84 (6)   |
| Al1 <sup>i</sup> —K1—Al1 <sup>vi</sup>  | 112.08 (3)  | Al1 <sup>vi</sup> —O4—K1                 | 112.25 (6)  |
| O1 <sup>i</sup> —K1—Al1 <sup>ii</sup>   | 67.44 (5)   | K1 <sup>vi</sup> —O4—K1                  | 92.28 (10)  |

Symmetry codes: (i)  $-x+1, -y+1/2, z-1/2$ ; (ii)  $x, y-1/2, z-1/2$ ; (iii)  $-x+1/2, y, z-1/2$ ; (iv)  $-x+1/2, y-1/2, z$ ; (v)  $x-1/2, -y+1/2, z$ ; (vi)  $-x+1, -y, z$ ; (vii)  $-x+1, -y+1/2, z+1/2$ ; (viii)  $x, y+1/2, z+1/2$ ; (ix)  $x+1/2, -y+1/2, z$ ; (x)  $-x+1/2, y+1/2, z$ ; (xi)  $-x+1/2, y, z+1/2$ .

Document origin: *publCIF* [Westrip, S. P. (2010). *J. Apply. Cryst.*, **43**, 920-925].

## Crystal Data for Rb<sub>2</sub>Al<sub>2</sub>O(OH)<sub>6</sub> (2)

|                                                               |                                                                   |
|---------------------------------------------------------------|-------------------------------------------------------------------|
| Rb <sub>2</sub> Al <sub>2</sub> O <sub>7</sub> H <sub>6</sub> | $D_x = 2.795 \text{ Mg m}^{-3}$                                   |
| $M_r = 342.95$                                                | Ag Ka radiation, $\lambda = 0.56086 \text{ \AA}$                  |
| Orthorhombic, <i>Aba</i> 2                                    | Cell parameters from 5220 reflections                             |
| $a = 10.3511 (8) \text{ \AA}$                                 | $q = 3.0\text{--}28.6^\circ$                                      |
| $b = 7.6823 (7) \text{ \AA}$                                  | $m = 6.58 \text{ mm}^{-1}$                                        |
| $c = 10.2481 (8) \text{ \AA}$                                 | $T = 110 \text{ K}$                                               |
| $V = 814.93 (12) \text{ \AA}^3$                               | Blocky, colorless                                                 |
| $Z = 4$                                                       | $0.04 \times 0.03 \times 0.02 \text{ mm}$                         |
| $F(000) = 648$                                                |                                                                   |
| <i>Data collection</i>                                        |                                                                   |
| Bruker APEX-II CCD diffractometer                             | 2057 reflections with $I > 2s(I)$                                 |
| f and w scans                                                 | $R_{\text{int}} = 0.088$                                          |
| Absorption correction: multi-scan SADABS (Krause 2015)        | $q_{\text{max}} = 31.8^\circ$ , $q_{\text{min}} = 3.0^\circ$      |
| $T_{\text{min}} = 0.639$ , $T_{\text{max}} = 0.746$           | $h = -19^{*}18$                                                   |
| 17980 measured reflections                                    | $k = -14^{*}14$                                                   |
| 2754 independent reflections                                  | $l = -19^{*}17$                                                   |
| <i>Refinement</i>                                             |                                                                   |
| Refinement on $F^2$                                           | Hydrogen site location: difference Fourier map                    |
| Least-squares matrix: full                                    | All H-atom parameters refined                                     |
| $R[F^2 > 2s(F^2)] = 0.043$                                    | $w = 1/[s^2(F_o^2) + (0.0182P)^2]$ where $P = (F_o^2 + 2F_c^2)/3$ |
| $wR(F^2) = 0.062$                                             | $(D/s)_{\text{max}} < 0.001$                                      |
| $S = 1.07$                                                    | $D\rho_{\text{max}} = 1.14 \text{ e \AA}^{-3}$                    |
| 2754 reflections                                              | $D\rho_{\text{min}} = -1.49 \text{ e \AA}^{-3}$                   |
| 63 parameters                                                 | Absolute structure: Flack x determined using 773                  |

---

quotients  $[(I+)-(I-)]/[(I+)+(I-)]$  (Parsons, Flack and Wagner, Acta Cryst. B69 (2013) 249-259).

4 restraints

Absolute structure parameter: 0.004 (10)

---

### Special details

*Geometry.* All esds (except the esd in the dihedral angle between two l.s. planes) are estimated using the full covariance matrix. The cell esds are taken into account individually in the estimation of esds in distances, angles and torsion angles; correlations between esds in cell parameters are only used when they are defined by crystal symmetry. An approximate (isotropic) treatment of cell esds is used for estimating esds involving l.s. planes.

Fractional atomic coordinates and isotropic or equivalent isotropic displacement parameters ( $\text{\AA}^2$ ) for (Rb2Al2O8H6)

|     | x            | y            | z            | $U_{\text{iso}}^*/U_{\text{eq}}$ |
|-----|--------------|--------------|--------------|----------------------------------|
| Rb1 | 0.20111 (3)  | 0.97386 (4)  | 0.35079 (4)  | 0.00902 (6)                      |
| Al1 | 0.00211 (11) | 0.79223 (14) | 0.08628 (11) | 0.00433 (19)                     |
| O1  | 0.1157 (3)   | 0.6689 (3)   | 0.1785 (3)   | 0.0078 (5)                       |
| O2  | 0.0558 (3)   | 0.7775 (4)   | -0.0766 (3)  | 0.0108 (5)                       |
| O3  | -0.1470 (3)  | 0.6832 (4)   | 0.0991 (3)   | 0.0094 (5)                       |
| O4  | 0.000000     | 1.000000     | 0.1489 (4)   | 0.0076 (7)                       |
| H2  | 0.010 (5)    | 0.808 (7)    | -0.155 (3)   | 0.033 (16)*                      |
| H1  | 0.119 (7)    | 0.548 (3)    | 0.156 (6)    | 0.027 (17)*                      |
| H3  | -0.213 (7)   | 0.765 (10)   | 0.079 (13)   | 0.11 (4)*                        |

### Atomic displacement parameters ( $\text{\AA}^2$ ) for (Rb2Al2O8H6)

|     | $U^{11}$        | $U^{22}$        | $U^{33}$        | $U^{12}$        | $U^{13}$        | $U^{23}$    |
|-----|-----------------|-----------------|-----------------|-----------------|-----------------|-------------|
| Rb1 | 0.00935<br>(11) | 0.00892<br>(11) | 0.00880<br>(11) | 0.00096<br>(11) | 0.00087<br>(19) | 0.0012 (2)  |
| Al1 | 0.0053 (4)      | 0.0021 (4)      | 0.0056 (5)      | 0.0003 (4)      | 0.0002 (4)      | -0.0003 (4) |

|    |             |             |             |             |              |              |
|----|-------------|-------------|-------------|-------------|--------------|--------------|
| O1 | 0.0069 (11) | 0.0050 (11) | 0.0114 (12) | 0.0007 (9)  | -0.0030 (10) | 0.0004 (9)   |
| O2 | 0.0120 (14) | 0.0138 (14) | 0.0065 (12) | 0.0024 (11) | 0.0008 (10)  | -0.0006 (9)  |
| O3 | 0.0068 (11) | 0.0062 (12) | 0.0151 (13) | -0.0005 (8) | -0.0001 (11) | -0.0019 (10) |
| O4 | 0.0125 (17) | 0.0026 (17) | 0.0077 (15) | 0.0010 (12) | 0.000        | 0.000        |

*Geometric parameters (Å, °) for (Rb<sub>2</sub>Al<sub>2</sub>O<sub>8</sub>H<sub>6</sub>)*

|                                         |             |                                           |              |
|-----------------------------------------|-------------|-------------------------------------------|--------------|
| Rb1—O3 <sup>i</sup>                     | 2.871 (3)   | Rb1—Al1                                   | 3.6794 (12)  |
| Rb1—O2 <sup>ii</sup>                    | 2.874 (3)   | Rb1—Al1 <sup>i</sup>                      | 3.7985 (13)  |
| Rb1—O4                                  | 2.942 (3)   | Rb1—Al1 <sup>vi</sup>                     | 3.8733 (12)  |
| Rb1—O1 <sup>iii</sup>                   | 2.993 (3)   | Rb1—Rb1 <sup>vii</sup>                    | 3.9722 (4)   |
| Rb1—O2 <sup>iv</sup>                    | 3.027 (3)   | Al1—O4                                    | 1.7203 (18)  |
| Rb1—O1                                  | 3.064 (3)   | Al1—O3                                    | 1.761 (3)    |
| Rb1—O3 <sup>v</sup>                     | 3.253 (3)   | Al1—O2                                    | 1.763 (3)    |
| Rb1—O2 <sup>i</sup>                     | 3.369 (3)   | Al1—O1                                    | 1.781 (3)    |
| O3 <sup>i</sup> —Rb1—O2 <sup>ii</sup>   | 90.56 (8)   | O1—Rb1—Rb1 <sup>vii</sup>                 | 48.25 (5)    |
| O3 <sup>i</sup> —Rb1—O4                 | 120.94 (7)  | O3 <sup>v</sup> —Rb1—Rb1 <sup>vii</sup>   | 61.19 (5)    |
| O2 <sup>ii</sup> —Rb1—O4                | 75.89 (7)   | O2 <sup>i</sup> —Rb1—Rb1 <sup>vii</sup>   | 69.32 (5)    |
| O3 <sup>i</sup> —Rb1—O1 <sup>iii</sup>  | 148.95 (8)  | Al1—Rb1—Rb1 <sup>vii</sup>                | 77.051 (18)  |
| O2 <sup>ii</sup> —Rb1—O1 <sup>iii</sup> | 94.48 (8)   | Al1 <sup>i</sup> —Rb1—Rb1 <sup>vii</sup>  | 67.710 (17)  |
| O4—Rb1—O1 <sup>iii</sup>                | 89.95 (7)   | Al1 <sup>vi</sup> —Rb1—Rb1 <sup>vii</sup> | 125.946 (17) |
| O3 <sup>i</sup> —Rb1—O2 <sup>iv</sup>   | 74.62 (8)   | O4—Al1—O3                                 | 113.71 (11)  |
| O2 <sup>ii</sup> —Rb1—O2 <sup>iv</sup>  | 140.91 (10) | O4—Al1—O2                                 | 114.61 (16)  |
| O4—Rb1—O2 <sup>iv</sup>                 | 142.67 (7)  | O3—Al1—O2                                 | 108.43 (16)  |
| O1 <sup>iii</sup> —Rb1—O2 <sup>iv</sup> | 82.40 (8)   | O4—Al1—O1                                 | 107.72 (14)  |
| O3 <sup>i</sup> —Rb1—O1                 | 97.65 (8)   | O3—Al1—O1                                 | 106.63 (14)  |
| O2 <sup>ii</sup> —Rb1—O1                | 128.23 (8)  | O2—Al1—O1                                 | 105.08 (15)  |
| O4—Rb1—O1                               | 56.13 (5)   | O4—Al1—Rb1                                | 51.73 (9)    |

---

|                                         |            |                                            |             |
|-----------------------------------------|------------|--------------------------------------------|-------------|
| O1 <sup>iii</sup> —Rb1—O1               | 103.03 (9) | O3—Al1—Rb1                                 | 128.04 (11) |
| O2 <sup>iv</sup> —Rb1—O1                | 90.03 (8)  | O2—Al1—Rb1                                 | 123.07 (11) |
| O3 <sup>i</sup> —Rb1—O3 <sup>v</sup>    | 129.87 (9) | O1—Al1—Rb1                                 | 56.05 (9)   |
| O2 <sup>ii</sup> —Rb1—O3 <sup>v</sup>   | 139.41 (8) | O4—Al1—Rb1 <sup>viii</sup>                 | 136.81 (8)  |
| O4—Rb1—O3 <sup>v</sup>                  | 79.02 (7)  | O3—Al1—Rb1 <sup>viii</sup>                 | 46.05 (10)  |
| O1 <sup>iii</sup> —Rb1—O3 <sup>v</sup>  | 53.96 (7)  | O2—Al1—Rb1 <sup>viii</sup>                 | 62.50 (11)  |
| O2 <sup>iv</sup> —Rb1—O3 <sup>v</sup>   | 66.94 (7)  | O1—Al1—Rb1 <sup>viii</sup>                 | 114.59 (10) |
| O1—Rb1—O3 <sup>v</sup>                  | 53.04 (7)  | Rb1—Al1—Rb1 <sup>viii</sup>                | 169.18 (3)  |
| O3 <sup>i</sup> —Rb1—O2 <sup>i</sup>    | 53.82 (7)  | O4—Al1—Rb1 <sup>vi</sup>                   | 45.71 (8)   |
| O2 <sup>ii</sup> —Rb1—O2 <sup>i</sup>   | 89.71 (8)  | O3—Al1—Rb1 <sup>vi</sup>                   | 72.08 (10)  |
| O4—Rb1—O2 <sup>i</sup>                  | 68.66 (6)  | O2—Al1—Rb1 <sup>vi</sup>                   | 149.71 (11) |
| O1 <sup>iii</sup> —Rb1—O2 <sup>i</sup>  | 156.50 (7) | O1—Al1—Rb1 <sup>vi</sup>                   | 103.54 (10) |
| O2 <sup>iv</sup> —Rb1—O2 <sup>i</sup>   | 108.44 (3) | Rb1—Al1—Rb1 <sup>vi</sup>                  | 67.20 (2)   |
| O1—Rb1—O2 <sup>i</sup>                  | 57.41 (7)  | Rb1 <sup>viii</sup> —Al1—Rb1 <sup>vi</sup> | 113.18 (3)  |
| O3 <sup>v</sup> —Rb1—O2 <sup>i</sup>    | 110.11 (7) | O4—Al1—Rb1 <sup>ix</sup>                   | 142.90 (8)  |
| O3 <sup>i</sup> —Rb1—Al1                | 112.61 (6) | O3—Al1—Rb1 <sup>ix</sup>                   | 101.85 (10) |
| O2 <sup>ii</sup> —Rb1—Al1               | 101.86 (6) | O2—Al1—Rb1 <sup>ix</sup>                   | 39.51 (10)  |
| O4—Rb1—Al1                              | 27.33 (2)  | O1—Al1—Rb1 <sup>ix</sup>                   | 69.83 (10)  |
| O1 <sup>iii</sup> —Rb1—Al1              | 96.30 (6)  | Rb1—Al1—Rb1 <sup>ix</sup>                  | 112.80 (3)  |
| O2 <sup>iv</sup> —Rb1—Al1               | 117.23 (6) | Rb1 <sup>viii</sup> —Al1—Rb1 <sup>ix</sup> | 64.75 (2)   |
| O1—Rb1—Al1                              | 28.83 (5)  | Rb1 <sup>vi</sup> —Al1—Rb1 <sup>ix</sup>   | 169.77 (3)  |
| O3 <sup>v</sup> —Rb1—Al1                | 62.97 (5)  | O4—Al1—Rb1 <sup>x</sup>                    | 85.08 (9)   |
| O2 <sup>i</sup> —Rb1—Al1                | 60.23 (5)  | O3—Al1—Rb1 <sup>x</sup>                    | 148.48 (11) |
| O3 <sup>i</sup> —Rb1—Al1 <sup>i</sup>   | 26.21 (6)  | O2—Al1—Rb1 <sup>x</sup>                    | 40.31 (10)  |
| O2 <sup>ii</sup> —Rb1—Al1 <sup>i</sup>  | 88.99 (6)  | O1—Al1—Rb1 <sup>x</sup>                    | 89.93 (10)  |
| O4—Rb1—Al1 <sup>i</sup>                 | 95.26 (5)  | Rb1—Al1—Rb1 <sup>x</sup>                   | 83.48 (2)   |
| O1 <sup>iii</sup> —Rb1—Al1 <sup>i</sup> | 174.32 (6) | Rb1 <sup>viii</sup> —Al1—Rb1 <sup>x</sup>  | 102.80 (3)  |
| O2 <sup>iv</sup> —Rb1—Al1 <sup>i</sup>  | 92.07 (6)  | Rb1 <sup>vi</sup> —Al1—Rb1 <sup>x</sup>    | 130.79 (3)  |
| O1—Rb1—Al1 <sup>i</sup>                 | 78.16 (6)  | Rb1 <sup>ix</sup> —Al1—Rb1 <sup>x</sup>    | 58.273 (17) |

---

|                                           |              |                                           |             |
|-------------------------------------------|--------------|-------------------------------------------|-------------|
| O3 <sup>v</sup> —Rb1—Al1 <sup>i</sup>     | 124.88 (5)   | Al1—O1—Rb1 <sup>vii</sup>                 | 175.84 (15) |
| O2 <sup>i</sup> —Rb1—Al1 <sup>i</sup>     | 27.66 (5)    | Al1—O1—Rb1                                | 95.12 (11)  |
| Al1—Rb1—Al1 <sup>i</sup>                  | 87.361 (9)   | Rb1 <sup>vii</sup> —O1—Rb1                | 81.95 (7)   |
| O3 <sup>i</sup> —Rb1—Al1 <sup>vi</sup>    | 135.18 (6)   | Al1—O2—Rb1 <sup>ix</sup>                  | 117.52 (14) |
| O2 <sup>ii</sup> —Rb1—Al1 <sup>vi</sup>   | 61.33 (6)    | Al1—O2—Rb1 <sup>x</sup>                   | 117.56 (14) |
| O4—Rb1—Al1 <sup>vi</sup>                  | 24.74 (2)    | Rb1 <sup>ix</sup> —O2—Rb1 <sup>x</sup>    | 84.58 (8)   |
| O1 <sup>iii</sup> —Rb1—Al1 <sup>vi</sup>  | 72.48 (6)    | Al1—O2—Rb1 <sup>viii</sup>                | 89.84 (12)  |
| O2 <sup>iv</sup> —Rb1—Al1 <sup>vi</sup>   | 148.73 (6)   | Rb1 <sup>ix</sup> —O2—Rb1 <sup>viii</sup> | 83.73 (7)   |
| O1—Rb1—Al1 <sup>vi</sup>                  | 78.16 (5)    | Rb1 <sup>x</sup> —O2—Rb1 <sup>viii</sup>  | 152.56 (10) |
| O3 <sup>v</sup> —Rb1—Al1 <sup>vi</sup>    | 83.08 (5)    | Al1—O3—Rb1 <sup>viii</sup>                | 107.74 (13) |
| O2 <sup>i</sup> —Rb1—Al1 <sup>vi</sup>    | 89.53 (5)    | Al1—O3—Rb1 <sup>xi</sup>                  | 131.23 (14) |
| Al1—Rb1—Al1 <sup>vi</sup>                 | 49.93 (3)    | Rb1 <sup>viii</sup> —O3—Rb1 <sup>xi</sup> | 116.91 (9)  |
| Al1 <sup>i</sup> —Rb1—Al1 <sup>vi</sup>   | 113.17 (3)   | Al1—O4—Al1 <sup>vi</sup>                  | 136.2 (2)   |
| O3 <sup>i</sup> —Rb1—Rb1 <sup>vii</sup>   | 69.10 (6)    | Al1—O4—Rb1                                | 100.95 (7)  |
| O2 <sup>ii</sup> —Rb1—Rb1 <sup>vii</sup>  | 156.68 (6)   | Al1 <sup>vi</sup> —O4—Rb1                 | 109.55 (8)  |
| O4—Rb1—Rb1 <sup>vii</sup>                 | 104.258 (15) | Al1—O4—Rb1 <sup>vi</sup>                  | 109.54 (8)  |
| O1 <sup>iii</sup> —Rb1—Rb1 <sup>vii</sup> | 108.82 (5)   | Al1 <sup>vi</sup> —O4—Rb1 <sup>vi</sup>   | 100.95 (7)  |
| O2 <sup>iv</sup> —Rb1—Rb1 <sup>vii</sup>  | 46.07 (6)    | Rb1—O4—Rb1 <sup>vi</sup>                  | 90.61 (10)  |

Symmetry codes: (i)  $-x, -y+3/2, z+1/2$ ; (ii)  $x, y+1/2, z+1/2$ ; (iii)  $-x+1/2, y+1/2, z$ ; (iv)  $-x+1/2, y, z+1/2$ ; (v)  $x+1/2, -y+3/2, z$ ; (vi)  $-x, -y+2, z$ ; (vii)  $-x+1/2, y-1/2, z$ ; (viii)  $-x, -y+3/2, z-1/2$ ; (ix)  $x, y-1/2, z-1/2$ ; (x)  $-x+1/2, y, z-1/2$ ; (xi)  $x-1/2, -y+3/2, z$ .

Document origin: *publCIF* [Westrip, S. P. (2010). *J. Apply. Cryst.*, **43**, 920-925].

### Crystal Data for CsAl(OH)<sub>4</sub>·2H<sub>2</sub>O (3)

CsAlO<sub>6</sub>H<sub>8</sub>

$F(000) = 228$

$M_r = 245.94$

$D_x = 2.333 \text{ Mg m}^{-3}$

|                                |                                                                 |
|--------------------------------|-----------------------------------------------------------------|
| Monoclinic, <i>C</i> 2         | Ag <i>K</i> $\alpha$ radiation, $\lambda = 0.56086 \text{ \AA}$ |
| $a = 10.4124 (15) \text{ \AA}$ | Cell parameters from 3749 reflections                           |
| $b = 6.6986 (10) \text{ \AA}$  | $q = 3.1\text{--}21.7^\circ$                                    |
| $c = 6.2156 (10) \text{ \AA}$  | $m = 2.83 \text{ mm}^{-1}$                                      |
| $\beta = 126.129 (4)^\circ$    | $T = 110 \text{ K}$                                             |
| $V = 350.16 (9) \text{ \AA}^3$ | Acicular, colorless                                             |
| $Z = 2$                        | $0.04 \times 0.01 \times 0.01 \text{ mm}$                       |

### Data collection

|                                                               |                                                  |
|---------------------------------------------------------------|--------------------------------------------------|
| Bruker APEX-II CCD diffractometer                             | 527 reflections with $I > 2s(I)$                 |
| $\phi$ and $\omega$ scans                                     | $q_{\max} = 21.7^\circ$ , $q_{\min} = 3.1^\circ$ |
| Absorption correction: multi-scan <i>SADABS</i> (Krause 2015) | $h = -13^{\circ}11$                              |
| $T_{\min} = 0.625$ , $T_{\max} = 0.745$                       | $k = 0^{\circ}8$                                 |
| 527 measured reflections                                      | $l = 0^{\circ}8$                                 |
| 527 independent reflections                                   |                                                  |

### Refinement

|                            |                                                                                            |
|----------------------------|--------------------------------------------------------------------------------------------|
| Refinement on $F^2$        | H-atom parameters not defined                                                              |
| Least-squares matrix: full | $w = 1/[s^2(F_o^2) + (0.0539P)^2]$ where $P = (F_o^2 + 2F_c^2)/3$                          |
| $R[F^2 > 2s(F^2)] = 0.027$ | $(D/s)_{\max} < 0.001$                                                                     |
| $wR(F^2) = 0.079$          | $D\rho_{\max} = 0.94 \text{ e \AA}^{-3}$                                                   |
| $S = 1.21$                 | $D\rho_{\min} = -1.02 \text{ e \AA}^{-3}$                                                  |
| 527 reflections            | Absolute structure: No quotients, so Flack parameter determined by classical intensity fit |
| 39 parameters              | Absolute structure parameter: $-0.03 (12)$                                                 |
| 1 restraint                |                                                                                            |

### Special details

*Geometry.* All esds (except the esd in the dihedral angle between two l.s. planes) are estimated using the full covariance matrix. The cell esds are taken into account individually in the estimation of esds in distances, angles and torsion angles; correlations between esds in cell parameters are only used when they are defined by crystal symmetry. An approximate (isotropic) treatment of cell esds is used for estimating esds involving l.s. planes.

*Refinement.* Refined as a 2-component twin.

*Fractional atomic coordinates and isotropic or equivalent isotropic displacement parameters ( $\text{\AA}^2$ ) for (CsAlOH<sub>4</sub>)*

|     | x           | y           | z           | $U_{\text{iso}}^*/U_{\text{eq}}$ |
|-----|-------------|-------------|-------------|----------------------------------|
| Cs1 | 0.500000    | 0.17830 (9) | 0.500000    | 0.0100 (2)                       |
| Al1 | 0.500000    | 0.662 (3)   | 1.000000    | 0.007 (2)                        |
| O1  | 0.3636 (10) | 0.5095 (12) | 0.7282 (14) | 0.0138 (14)                      |
| O2  | 0.5884 (10) | 0.8230 (12) | 0.9015 (16) | 0.0133 (15)                      |
| O1W | 0.2690 (9)  | 0.2201 (11) | 0.7680 (13) | 0.017 (2)                        |

*Atomic displacement parameters ( $\text{\AA}^2$ ) for (CsAlOH<sub>4</sub>)*

|     | $U^{11}$    | $U^{22}$   | $U^{33}$    | $U^{12}$   | $U^{13}$    | $U^{23}$   |
|-----|-------------|------------|-------------|------------|-------------|------------|
| Cs1 | 0.0101 (4)  | 0.0092 (4) | 0.0118 (3)  | 0.000      | 0.0070 (3)  | 0.000      |
| Al1 | 0.0081 (14) | 0.008 (6)  | 0.0050 (13) | 0.000      | 0.0036 (11) | 0.000      |
| O1  | 0.022 (4)   | 0.009 (3)  | 0.007 (3)   | -0.006 (3) | 0.007 (3)   | -0.001 (3) |
| O2  | 0.020 (4)   | 0.006 (3)  | 0.018 (3)   | -0.005 (3) | 0.014 (3)   | -0.003 (3) |
| O1W | 0.021 (4)   | 0.017 (8)  | 0.014 (3)   | 0.008 (3)  | 0.011 (3)   | 0.003 (2)  |

*Geometric parameters ( $\text{\AA}$ ,  $^\circ$ ) for (CsAlOH<sub>4</sub>)*

|                       |           |                        |            |
|-----------------------|-----------|------------------------|------------|
| Cs1—O2 <sup>i</sup>   | 3.167 (8) | Cs1—O1W <sup>vi</sup>  | 3.696 (6)  |
| Cs1—O2 <sup>ii</sup>  | 3.167 (8) | Cs1—O1W <sup>vii</sup> | 3.696 (6)  |
| Cs1—O1 <sup>iii</sup> | 3.360 (9) | Cs1—O2 <sup>viii</sup> | 3.788 (8)  |
| Cs1—O1 <sup>iv</sup>  | 3.360 (9) | Cs1—O2 <sup>ix</sup>   | 3.788 (8)  |
| Cs1—O1                | 3.366 (9) | Al1—O2                 | 1.747 (15) |



---

|                                         |             |                                            |             |
|-----------------------------------------|-------------|--------------------------------------------|-------------|
| Cs1—O1 <sup>v</sup>                     | 3.366 (9)   | Al1—O2 <sup>vi</sup>                       | 1.747 (15)  |
| Cs1—O1W <sup>v</sup>                    | 3.656 (7)   | Al1—O1                                     | 1.756 (14)  |
| Cs1—O1W                                 | 3.656 (7)   | Al1—O1 <sup>vi</sup>                       | 1.756 (14)  |
| O2 <sup>i</sup> —Cs1—O2 <sup>ii</sup>   | 82.6 (3)    | O1W <sup>vi</sup> —Cs1—O1W <sup>vii</sup>  | 171.3 (2)   |
| O2 <sup>i</sup> —Cs1—O1 <sup>iii</sup>  | 71.52 (19)  | O2 <sup>i</sup> —Cs1—O2 <sup>viii</sup>    | 126.9 (2)   |
| O2 <sup>ii</sup> —Cs1—O1 <sup>iii</sup> | 79.13 (19)  | O2 <sup>ii</sup> —Cs1—O2 <sup>viii</sup>   | 77.50 (14)  |
| O2 <sup>i</sup> —Cs1—O1 <sup>iv</sup>   | 79.13 (19)  | O1 <sup>iii</sup> —Cs1—O2 <sup>viii</sup>  | 147.30 (16) |
| O2 <sup>ii</sup> —Cs1—O1 <sup>iv</sup>  | 71.52 (19)  | O1 <sup>iv</sup> —Cs1—O2 <sup>viii</sup>   | 47.98 (17)  |
| O1 <sup>iii</sup> —Cs1—O1 <sup>iv</sup> | 140.7 (3)   | O1—Cs1—O2 <sup>viii</sup>                  | 86.08 (18)  |
| O2 <sup>i</sup> —Cs1—O1                 | 146.0 (2)   | O1 <sup>v</sup> —Cs1—O2 <sup>viii</sup>    | 74.39 (18)  |
| O2 <sup>ii</sup> —Cs1—O1                | 99.33 (18)  | O1W <sup>v</sup> —Cs1—O2 <sup>viii</sup>   | 76.14 (16)  |
| O1 <sup>iii</sup> —Cs1—O1               | 75.48 (12)  | O1W—Cs1—O2 <sup>viii</sup>                 | 101.56 (16) |
| O1 <sup>iv</sup> —Cs1—O1                | 134.0 (2)   | O1W <sup>vi</sup> —Cs1—O2 <sup>viii</sup>  | 39.94 (16)  |
| O2 <sup>i</sup> —Cs1—O1 <sup>v</sup>    | 99.33 (18)  | O1W <sup>vii</sup> —Cs1—O2 <sup>viii</sup> | 136.71 (17) |
| O2 <sup>ii</sup> —Cs1—O1 <sup>v</sup>   | 146.0 (2)   | O2 <sup>i</sup> —Cs1—O2 <sup>ix</sup>      | 77.50 (14)  |
| O1 <sup>iii</sup> —Cs1—O1 <sup>v</sup>  | 134.0 (2)   | O2 <sup>ii</sup> —Cs1—O2 <sup>ix</sup>     | 126.9 (2)   |
| O1 <sup>iv</sup> —Cs1—O1 <sup>v</sup>   | 75.48 (12)  | O1 <sup>iii</sup> —Cs1—O2 <sup>ix</sup>    | 47.98 (17)  |
| O1—Cs1—O1 <sup>v</sup>                  | 97.5 (2)    | O1 <sup>iv</sup> —Cs1—O2 <sup>ix</sup>     | 147.30 (16) |
| O2 <sup>i</sup> —Cs1—O1W <sup>v</sup>   | 70.25 (18)  | O1—Cs1—O2 <sup>ix</sup>                    | 74.39 (18)  |
| O2 <sup>ii</sup> —Cs1—O1W <sup>v</sup>  | 116.94 (18) | O1 <sup>v</sup> —Cs1—O2 <sup>ix</sup>      | 86.09 (18)  |
| O1 <sup>iii</sup> —Cs1—O1W <sup>v</sup> | 135.53 (16) | O1W <sup>v</sup> —Cs1—O2 <sup>ix</sup>     | 101.56 (16) |
| O1 <sup>iv</sup> —Cs1—O1W <sup>v</sup>  | 48.54 (17)  | O1W—Cs1—O2 <sup>ix</sup>                   | 76.14 (16)  |
| O1—Cs1—O1W <sup>v</sup>                 | 134.11 (17) | O1W <sup>vi</sup> —Cs1—O2 <sup>ix</sup>    | 136.71 (17) |
| O1 <sup>v</sup> —Cs1—O1W <sup>v</sup>   | 37.14 (18)  | O1W <sup>vii</sup> —Cs1—O2 <sup>ix</sup>   | 39.94 (16)  |
| O2 <sup>i</sup> —Cs1—O1W                | 116.94 (18) | O2 <sup>viii</sup> —Cs1—O2 <sup>ix</sup>   | 150.3 (2)   |
| O2 <sup>ii</sup> —Cs1—O1W               | 70.25 (18)  | O2—Al1—O2 <sup>vi</sup>                    | 103.6 (12)  |
| O1 <sup>iii</sup> —Cs1—O1W              | 48.54 (17)  | O2—Al1—O1                                  | 108.4 (3)   |
| O1 <sup>iv</sup> —Cs1—O1W               | 135.54 (16) | O2 <sup>vi</sup> —Al1—O1                   | 113.7 (4)   |

---

|                                           |             |                                         |            |
|-------------------------------------------|-------------|-----------------------------------------|------------|
| O1—Cs1—O1W                                | 37.14 (18)  | O2—Al1—O1 <sup>vi</sup>                 | 113.7 (4)  |
| O1 <sup>v</sup> —Cs1—O1W                  | 134.11 (17) | O2 <sup>vi</sup> —Al1—O1 <sup>vi</sup>  | 108.4 (3)  |
| O1W <sup>v</sup> —Cs1—O1W                 | 171.2 (2)   | O1—Al1—O1 <sup>vi</sup>                 | 109.0 (12) |
| O2 <sup>i</sup> —Cs1—O1W <sup>vi</sup>    | 134.65 (18) | O2—Al1—Cs1 <sup>x</sup>                 | 64.2 (3)   |
| O2 <sup>ii</sup> —Cs1—O1W <sup>vi</sup>   | 53.93 (19)  | O2 <sup>vi</sup> —Al1—Cs1 <sup>x</sup>  | 113.8 (5)  |
| O1 <sup>iii</sup> —Cs1—O1W <sup>vi</sup>  | 107.38 (17) | O1—Al1—Cs1 <sup>x</sup>                 | 132.3 (6)  |
| O1 <sup>iv</sup> —Cs1—O1W <sup>vi</sup>   | 75.66 (17)  | O1 <sup>vi</sup> —Al1—Cs1 <sup>x</sup>  | 50.0 (3)   |
| O1—Cs1—O1W <sup>vi</sup>                  | 63.97 (17)  | O2—Al1—Cs1 <sup>xi</sup>                | 113.8 (5)  |
| O1 <sup>v</sup> —Cs1—O1W <sup>vi</sup>    | 109.80 (17) | O2 <sup>vi</sup> —Al1—Cs1 <sup>xi</sup> | 64.2 (3)   |
| O1W <sup>v</sup> —Cs1—O1W <sup>vi</sup>   | 115.4 (2)   | O1—Al1—Cs1 <sup>xi</sup>                | 50.0 (3)   |
| O1W—Cs1—O1W <sup>vi</sup>                 | 63.8 (2)    | O1 <sup>vi</sup> —Al1—Cs1 <sup>xi</sup> | 132.3 (6)  |
| O2 <sup>i</sup> —Cs1—O1W <sup>vii</sup>   | 53.93 (19)  | Cs1 <sup>x</sup> —Al1—Cs1 <sup>xi</sup> | 177.0 (5)  |
| O2 <sup>ii</sup> —Cs1—O1W <sup>vii</sup>  | 134.65 (18) | Al1—O1—Cs1 <sup>xi</sup>                | 106.4 (5)  |
| O1 <sup>iii</sup> —Cs1—O1W <sup>vii</sup> | 75.66 (17)  | Al1—O1—Cs1                              | 119.0 (5)  |
| O1 <sup>iv</sup> —Cs1—O1W <sup>vii</sup>  | 107.38 (16) | Cs1 <sup>xi</sup> —O1—Cs1               | 134.0 (2)  |
| O1—Cs1—O1W <sup>vii</sup>                 | 109.80 (17) | Al1—O2—Cs1 <sup>xii</sup>               | 140.6 (5)  |
| O1 <sup>v</sup> —Cs1—O1W <sup>vii</sup>   | 63.97 (17)  | Al1—O2—Cs1 <sup>x</sup>                 | 91.3 (4)   |
| O1W <sup>v</sup> —Cs1—O1W <sup>vii</sup>  | 63.8 (2)    | Cs1 <sup>xii</sup> —O2—Cs1 <sup>x</sup> | 126.9 (2)  |
| O1W—Cs1—O1W <sup>vii</sup>                | 115.4 (2)   | Cs1—O1W—Cs1 <sup>xiii</sup>             | 115.4 (2)  |

Symmetry codes: (i)  $-x+1, y-1, -z+1$ ; (ii)  $x, y-1, z$ ; (iii)  $-x+1/2, y-1/2, -z+1$ ; (iv)  $x+1/2, y-1/2, z$ ; (v)  $-x+1, y, -z+1$ ; (vi)  $-x+1, y, -z+2$ ; (vii)  $x, y, z-1$ ; (viii)  $-x+3/2, y-1/2, -z+2$ ; (ix)  $x-1/2, y-1/2, z-1$ ; (x)  $x+1/2, y+1/2, z+1$ ; (xi)  $x-1/2, y+1/2, z$ ; (xii)  $x, y+1, z$ ; (xiii)  $x, y, z+1$ .

Document origin: *publCIF* [Westrip, S. P. (2010). *J. Apply. Cryst.*, **43**, 920-925].
